# Supplementary material for: Bias correction of OMI HCHO columns based on FTIR and aircraft measurements and impact on top-down emission estimates
Source: Copernicus journal article supplement (doi:10.5194/acp-24-2207-2024), 2024-02-22
Supplement: Supplementary file 1 [file acp-24-2207-2024-supplement.pdf]

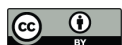

*Supplement of*

## **Bias correction of OMI HCHO columns based on FTIR and aircraft measurements and impact on top-down emission estimates**

**Jean-François Mü**

*Correspondence to:* Jean-François Müller (jfm@aeronomie.be)

The copyright of individual parts of the supplement might differ from the article licence.

**Table S1.** FTIR stations contributing in this work: longitude, latitude, altitude above sea level, retrieval code and team.

| Station               |     | Latitude<br>North | Longitude<br>East | Altitude<br>(km) | Code    | Team                |
|-----------------------|-----|-------------------|-------------------|------------------|---------|---------------------|
| Eureka                | EUR | 80.05             | -86.42            | 0.61             | SFIT4   | U. Toronto          |
| Ny-Ålesund            | NYA | 78.92             | 11.92             | 0.02             | SFIT4   | U. Bremen           |
| Thule                 | THU | 76.52             | -68.77            | 0.22             | SFIT4   | NCAR                |
| Kiruna                | KIR | 67.84             | 20.40             | 0.42             | PROFFIT | KIT-ASF; IRF Kiruna |
| Sodankylä             | SOD | 67.37             | 26.63             | 0.19             | SFIT4   | FMI; BIRA           |
| St. Petersburg        | SPE | 59.88             | 29.83             | 0.02             | SFIT4   | SPbU                |
| Bremen                | BRE | 53.10             | 8.85              | 0.03             | SFIT4   | U. Bremen           |
| Paris                 | PAR | 48.97             | 2.37              | 0.06             | PROFFIT | Sorbonne U.         |
| Garmisch              | GAR | 47.48             | 11.06             | 0.74             | PROFFIT | KIT-IFU             |
| Zugspitze             | ZUG | 47.42             | 10.98             | 2.96             | PROFFIT | KIT-IFU             |
| Junfraujoch           | JFJ | 46.55             | 7.98              | 3.58             | SFIT4   | U. Liège            |
| Toronto               | TOR | 43.60             | -79.40            | 0.17             | SFIT4   | U. Toronto          |
| Rikubetsu             | RIK | 43.46             | 143.77            | 0.38             | SFIT4   | Nagoya U.; NIES     |
| Boulder               | BOU | 40.04             | -105.24           | 1.61             | SFIT4   | NCAR                |
| Tsukuba               | TSU | 36.05             | 140.12            | 0.03             | SFIT4   | NIES; Tohoku U.     |
| Hefei                 | HEF | 31.91             | 117.17            | 0.03             | SFIT4   | HFIPS; CAS          |
| Izaña                 | IZA | 28.30             | -16.48            | 2.37             | PROFFIT | AEMET; KIT-ASF      |
| Mauna Loa             | MLO | 19.54             | -155.57           | 3.40             | SFIT4   | NCAR                |
| Mexico City (UNAM)    | MEX | 19.33             | -99.18            | 2.26             | PROFFIT | UNAM                |
| Altzomoni             | ALT | 19.12             | -98.66            | 3.98             | PROFFIT | UNAM                |
| Paramaribo            | PAM | 5.81              | -55.21            | 0.03             | SFIT4   | U. Bremen           |
| Porto Velho           | PVO | -8.77             | -63.87            | 0.09             | SFIT4   | BIRA                |
| La Réunion – St.Denis | SDE | -20.90            | 55.48             | 0.08             | SFIT4   | BIRA                |
| La Réunion – Maïdo    | MAI | -21.08            | 55.38             | 2.16             | SFIT4   | BIRA                |
| Wollongong            | WOL | -34.41            | 150.88            | 0.03             | SFIT4   | U. Wollongong       |
| Lauder                | LAU | -45.04            | 169.68            | 0.37             | SFIT4   | NIWA                |

**Table S2.** A priori and optimized annual NMVOC emissions over the model domain (10-54°N, 65-130°W) in the aircraft-based inversion (TgVOC yr<sup>-1</sup>).

|                        | A priori | Optimized |
|------------------------|----------|-----------|
| <b>Biomass burning</b> |          |           |
| 2012                   | 2.5      | 3.4       |
| 2013                   | 5.1      | 6.1       |
| <b>Anthropogenic</b>   |          |           |
| 2012                   | 19.7     | 98.3      |
| 2013                   | 19.7     | 88.7      |
| <b>Biogenic</b>        |          |           |
| 2012                   | 37.9     | 36.4      |
| 2013                   | 32.8     | 31.6      |
| <b>Total</b>           |          |           |
| 2012-2013 average      | 118      | 264       |

**Table S3.** Impact of bias correction on top-down NMVOC emission totals ( $\text{Tg year}^{-1}$ ) over the same large regions as in Table 3 in the main manuscript. The means are taken over 2011-2017 for optimizations using either uncorrected (OPT1) or bias-corrected OMI HCHO columns (OPT2). The total land surface area of the regions is also given.

|                                        | North America | South America | Europe | NH Africa | SH Africa | North Asia | South Asia | Oceania | <b>Global</b> |
|----------------------------------------|---------------|---------------|--------|-----------|-----------|------------|------------|---------|---------------|
| Surface area ( $10^6 \text{ km}^2$ )   | 22.1          | 18.0          | 9.6    | 25.6      | 25.6      | 23.7       | 14.9       | 8.0     | <b>147</b>    |
| <b>Biomass burning NMVOC emissions</b> |               |               |        |           |           |            |            |         |               |
| GFED4s 2011–2017                       | 6.6           | 12.1          | 1.2    | 15.7      | 25.1      | 7.3        | 14.3       | 4.2     | <b>87</b>     |
| OPT1 (no bias correction)              | 6.1           | 9.8           | 1.7    | 10.9      | 23.8      | 9.4        | 10.7       | 4.0     | <b>77</b>     |
| OPT2 (bias-corrected)                  | 6.1           | 10.8          | 1.6    | 12.2      | 29.7      | 8.9        | 12.5       | 4.2     | <b>87</b>     |
| <b>Isoprene emissions</b>              |               |               |        |           |           |            |            |         |               |
| MEGAN-MOHYCAN 2011–2017                | 35.2          | 148.8         | 6.7    | 85.6      | 44.6      | 9.5        | 39.1       | 60.9    | <b>430</b>    |
| OPT1 (no bias correction)              | 33.5          | 107.6         | 9.0    | 60.7      | 59.4      | 14.6       | 38.8       | 34.6    | <b>362</b>    |
| OPT2 (bias-corrected)                  | 45.3          | 125.9         | 12.1   | 77.3      | 75.1      | 17.1       | 55.8       | 37.0    | <b>451</b>    |
| <b>Anthropogenic NMVOC emissions</b>   |               |               |        |           |           |            |            |         |               |
| EDGAR 2011–2017                        | 20.3          | 12.8          | 16.7   | 41.4      | 12.3      | 11.9       | 54.6       | 1.1     | <b>179</b>    |
| OPT1 (no bias correction)              | 36.0          | 12.1          | 23.4   | 43.6      | 13.5      | 16.0       | 56.7       | 1.1     | <b>215</b>    |
| OPT2 (bias-corrected)                  | 20.6          | 11.6          | 18.0   | 36.6      | 13.3      | 15.3       | 62.0       | 1.1     | <b>192</b>    |
| <b>Total NMVOC emissions</b>           |               |               |        |           |           |            |            |         |               |
| A priori 2011–2017                     | 62            | 174           | 25     | 143       | 82        | 29         | 108        | 66      | <b>701</b>    |
| OPT1 (no bias correction)              | 76            | 129           | 34     | 115       | 97        | 40         | 106        | 40      | <b>654</b>    |
| OPT2 (bias-corrected)                  | 72            | 148           | 32     | 126       | 118       | 41         | 130        | 42      | <b>730</b>    |

**Table S4.** Statistics of the comparison between HCHO mixing ratios measurements from aircraft campaigns and the model simulations using a priori emissions (APRI), optimized emissions constrained by OMI without bias-correction (OPT1) or with bias-correction (OPT2). OPT3 is as OPT2, but with doubled errors on the emission parameters (only for 2013 campaigns).  $n$  is the number of measurements. The bias (%) is calculated as  $100 \times \langle C_m - C_o \rangle / \langle C_o \rangle$ , where  $C_m$  and  $C_o$  denote the simulated and observed mixing ratios, respectively, and  $\langle \dots \rangle$  denotes the average over all data from each campaign. The root-mean square deviation (RMSD) is calculated as  $\langle (C_m - C_o)^2 \rangle^{1/2}$ . Only data below 4 km altitude are considered. See Table 1 and Fig. 1 in the main manuscript for additional details on the campaigns.

|                        | $n$   | $C_o$<br>(ppbv) | Bias<br>APRI<br>% | Bias<br>OPT1<br>% | Bias<br>OPT2<br>% | Bias<br>OPT3<br>% | RMSD<br>APRI<br>ppbv | RMSD<br>OPT1<br>ppbv | RMSD<br>OPT2<br>ppbv | RMSD<br>OPT3<br>ppbv |
|------------------------|-------|-----------------|-------------------|-------------------|-------------------|-------------------|----------------------|----------------------|----------------------|----------------------|
| DC3 (DC8)              | 1699  | 1.70            | -38               | -34               | -21               | -15               | 0.66                 | 0.62                 | 0.39                 | 0.30                 |
| DC3 (GV)               | 949   | 1.55            | -29               | -23               | -2                | +4                | 0.52                 | 0.45                 | 0.34                 | 0.31                 |
| SEAC <sup>4</sup> RS   | 3385  | 2.39            | +3                | -16               | +15               | +12               | 0.20                 | 0.48                 | 0.43                 | 0.35                 |
| MILAGRO (DC8)          | 547   | 1.86            | -29               | -25               | -16               |                   | 0.67                 | 0.60                 | 0.44                 |                      |
| ARCTAS-CARB            | 882   | 2.73            | -50               | -29               | -10               |                   | 1.53                 | 0.96                 | 0.49                 |                      |
| ARCTAS-B               | 777   | 2.41            | +11               | +6                | +9                |                   | 0.81                 | 0.60                 | 0.61                 |                      |
| DISCOVER-AQ Maryland   | 3403  | 2.12            | -18               | -15               | +8                |                   | 0.64                 | 0.58                 | 0.22                 |                      |
| SENEX                  | 3821  | 3.70            | -30               | -38               | -7                | -10               | 1.18                 | 1.51                 | 0.38                 | 0.49                 |
| DISCOVER-AQ California | 3611  | 1.15            | -55               | -41               | -53               | -53               | 0.80                 | 0.63                 | 0.77                 | 0.78                 |
| DISCOVER-AQ Colorado   | 2379  | 1.92            | -52               | -44               | -43               |                   | 1.08                 | 0.94                 | 0.92                 |                      |
| KORUS-AQ               | 499   | 1.67            | -35               | -33               | -22               |                   | 0.69                 | 0.65                 | 0.44                 |                      |
| All campaigns          | 21952 | 2.22            | -26.6             | -28.2             | -9.0              |                   | 0.85                 | 0.86                 | 0.55                 |                      |

**Table S5.** Statistics of the comparison between FTIR columns (2011–2017) and model simulations using a priori emissions (APRI), optimized emissions constrained by OMI without bias-correction (OPT1) or with bias-correction (OPT2).  $n$  is the number of measurements. The bias (%) is calculated as  $100 \times \langle C_m - C_o \rangle / \langle C_o \rangle$ , where  $C_m$  and  $C_o$  denote the simulated and observed columns, respectively, and  $\langle \dots \rangle$  denotes the average over all data from each station. The root-mean square deviation (RMSD) is calculated as  $(\langle (C_m - C_o)^2 \rangle)^{1/2}$ .

|               | $n$  | $C_o$<br>$10^{15} \text{ molec.cm}^{-2}$ | Bias<br>APRI<br>% | Bias<br>OPT1<br>% | Bias<br>OPT2<br>% | RMSD<br>APRI<br>ppbv | RMSD<br>OPT1<br>ppbv | RMSD<br>OPT2<br>ppbv |
|---------------|------|------------------------------------------|-------------------|-------------------|-------------------|----------------------|----------------------|----------------------|
| Kiruna        | 624  | 1.8                                      | +16               | +25               | +20               | 0.43                 | 0.57                 | 0.51                 |
| Sodankyla     | 2258 | 2.3                                      | +6                | +15               | +11               | 0.42                 | 0.51                 | 0.43                 |
| St.Petersburg | 2009 | 5.9                                      | -18               | -10               | -13               | 1.42                 | 1.14                 | 1.11                 |
| Bremen        | 311  | 5.6                                      | -14               | +9                | -8                | 1.79                 | 1.97                 | 1.50                 |
| Paris         | 5068 | 7.5                                      | -24               | -16               | -19               | 2.32                 | 1.86                 | 1.94                 |
| Garmisch      | 2600 | 5.7                                      | -8                | +3                | +4                | 1.25                 | 0.96                 | 0.61                 |
| Toronto       | 1267 | 9.3                                      | -30               | -26               | -25               | 2.59                 | 2.08                 | 2.09                 |
| Boulder       | 409  | 4.9                                      | -39               | -33               | -33               | 3.12                 | 2.67                 | 2.58                 |
| Mexico City   | 3754 | 25.6                                     | -67               | -68               | -64               | 16.79                | 16.84                | 15.90                |
| Paramaribo    | 140  | 6.2                                      | +21               | +6                | +4                | 1.70                 | 1.10                 | 1.03                 |
| Porto Velho   | 433  | 18.6                                     | +20               | -20               | -2                | 5.36                 | 3.89                 | 2.35                 |

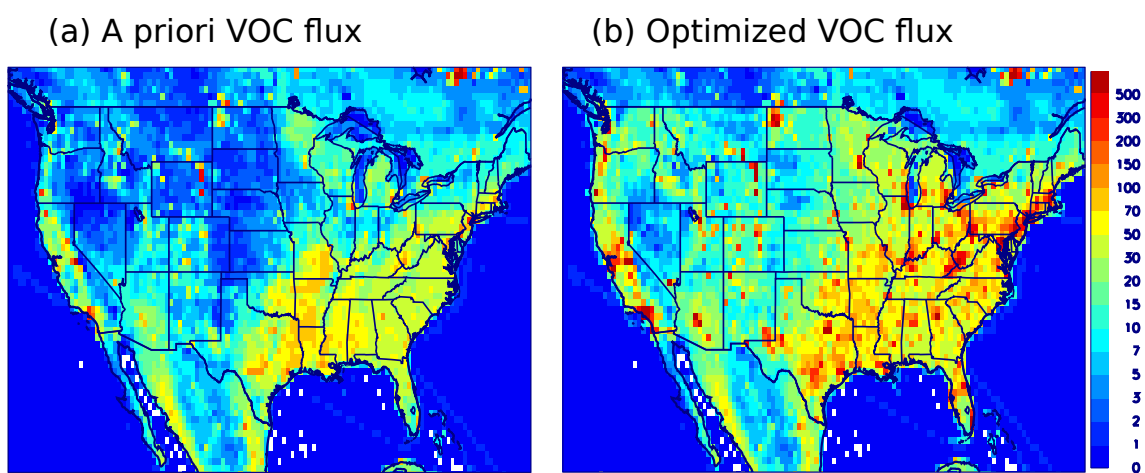

**Figure S1.** VOC flux distribution ( $10^{10}$  molec.  $\text{cm}^{-2}$   $\text{s}^{-1}$ ) according to the (a) a priori inventories and (b) the aircraft-based emission inversion. The sum of all three categories (anthropogenic, biomass burning, biogenic) is shown for June-Aug. 2013.

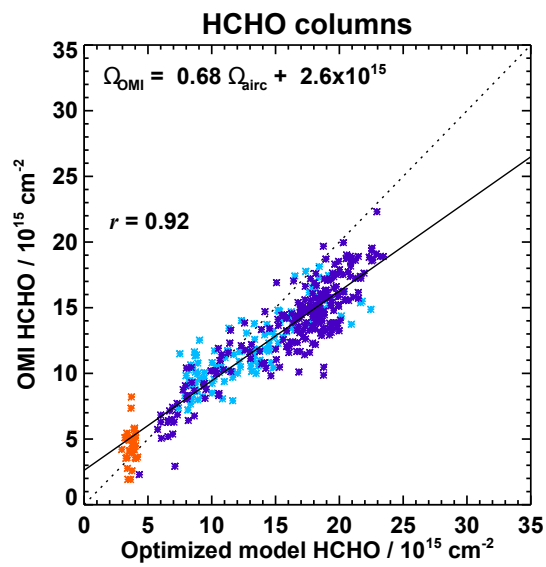

**Figure S2.** As in Fig. 5b, for the standard cloud-corrected QA4ECV HCHO product. The correlation coefficient, slope and intercept of a linear regression using the Theil-Sen estimator are given. The regression is shown as black solid line.



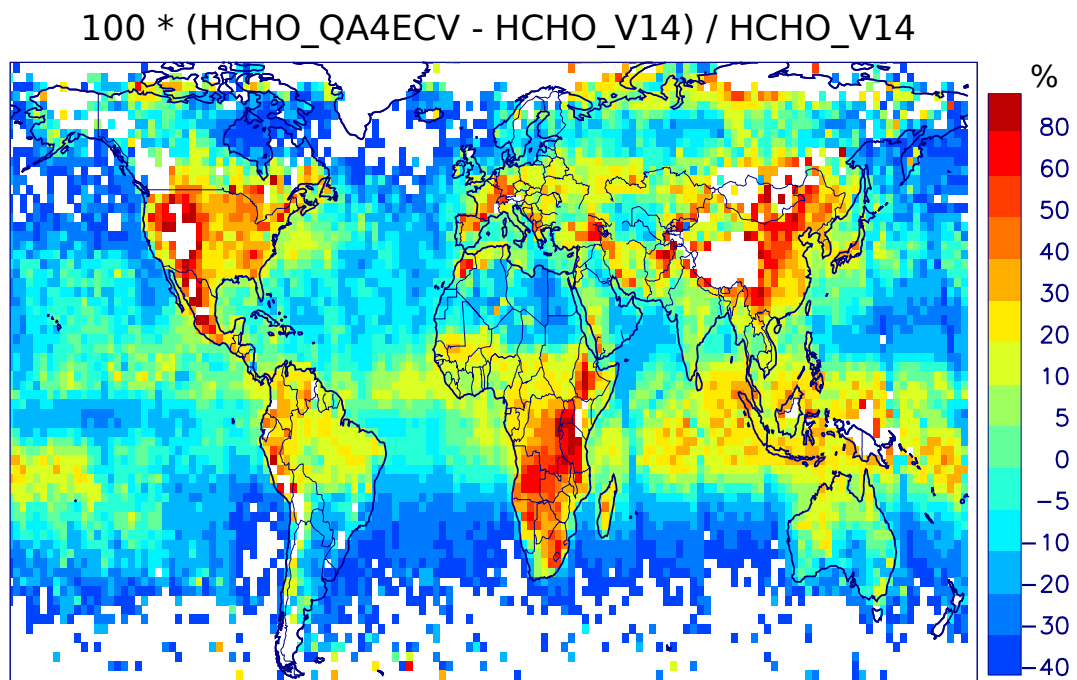

**Figure S3.** Percentage difference between the yearly-averaged HCHO columns from QA4ECV (with clear-sky air mass factors) and the HCHO columns the from BIRA V14 product (De Smedt et al., 2015). The same cloud filter is applied in both case (cloud fraction < 0.4).

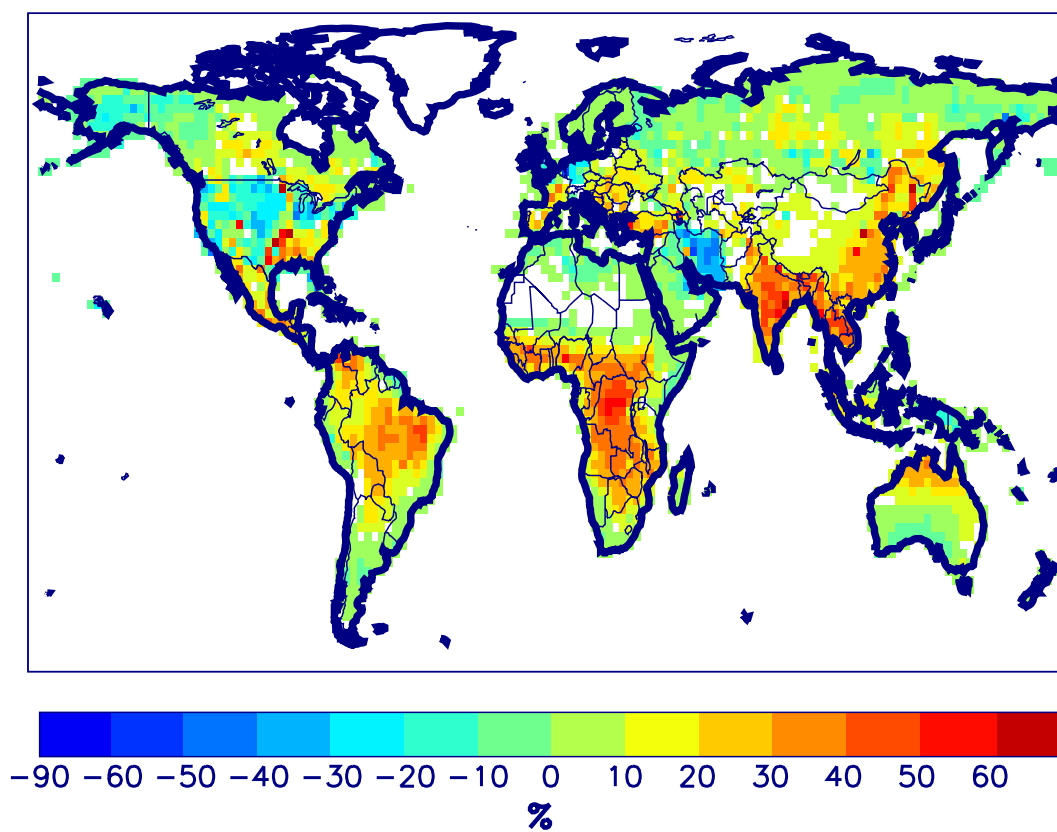

**Figure S4.** Percentage change in total top-down VOC flux (2011–2017 average) due to the bias correction of OMI data, i.e. between runs OPT1 and OPT2.

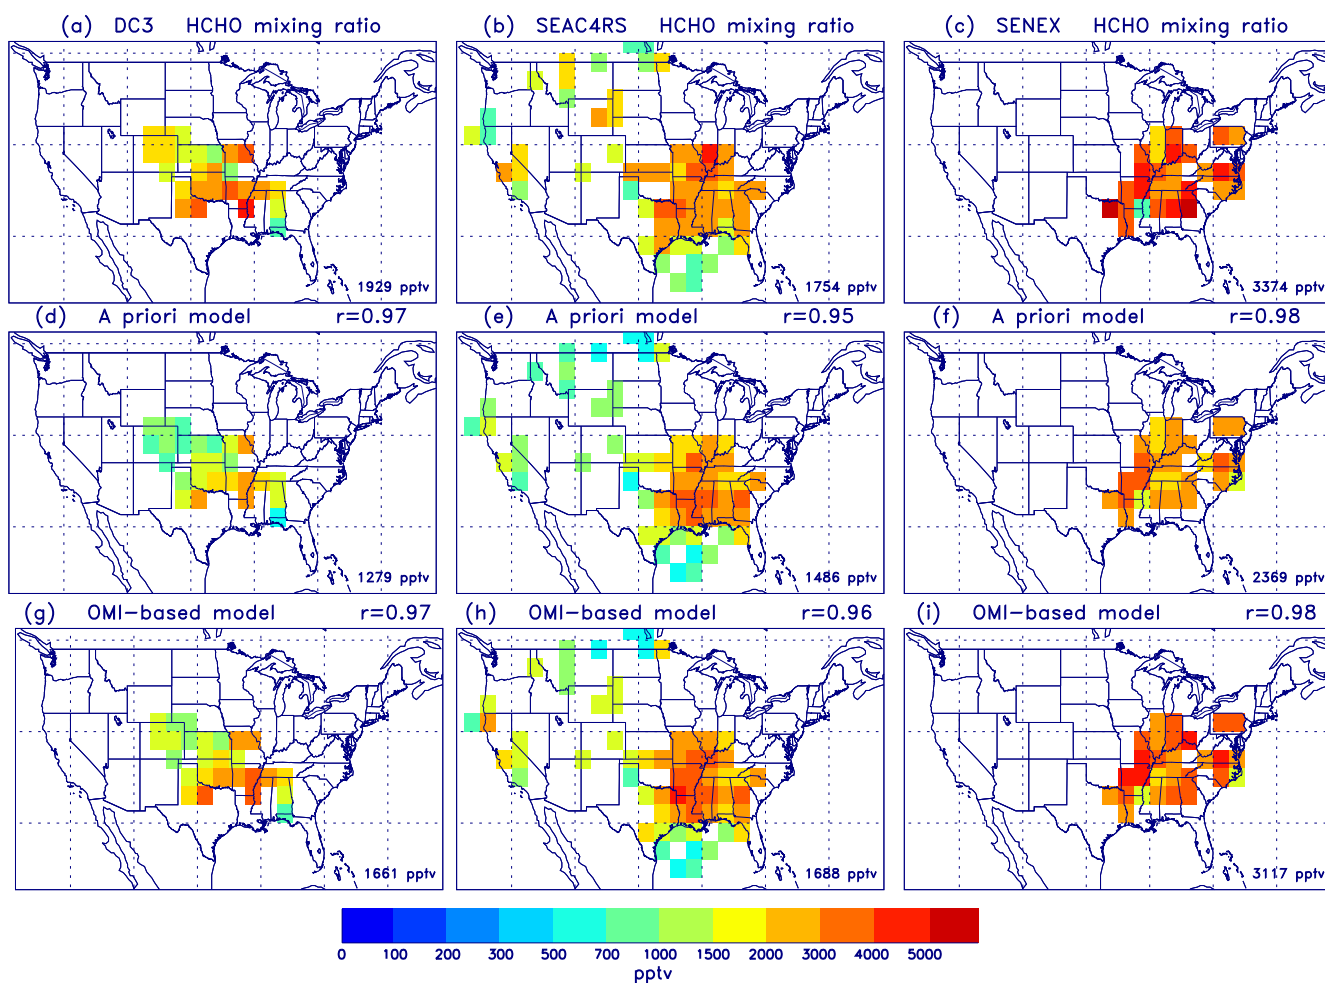

**Figure S5.** Measured HCHO mixing ratio below 4 km altitude (pptv) from the campaigns (a) DC3, (b) SEAC<sup>4</sup>RS, and (c) SENEX, and corresponding model distributions using a priori emissions (d, e, f) and with optimized emissions based on bias-corrected OMI (OPT2) (g, h, i). The data were regridded to the model resolution. The average measured or modelled mixing ratio is given inset for each campaign.

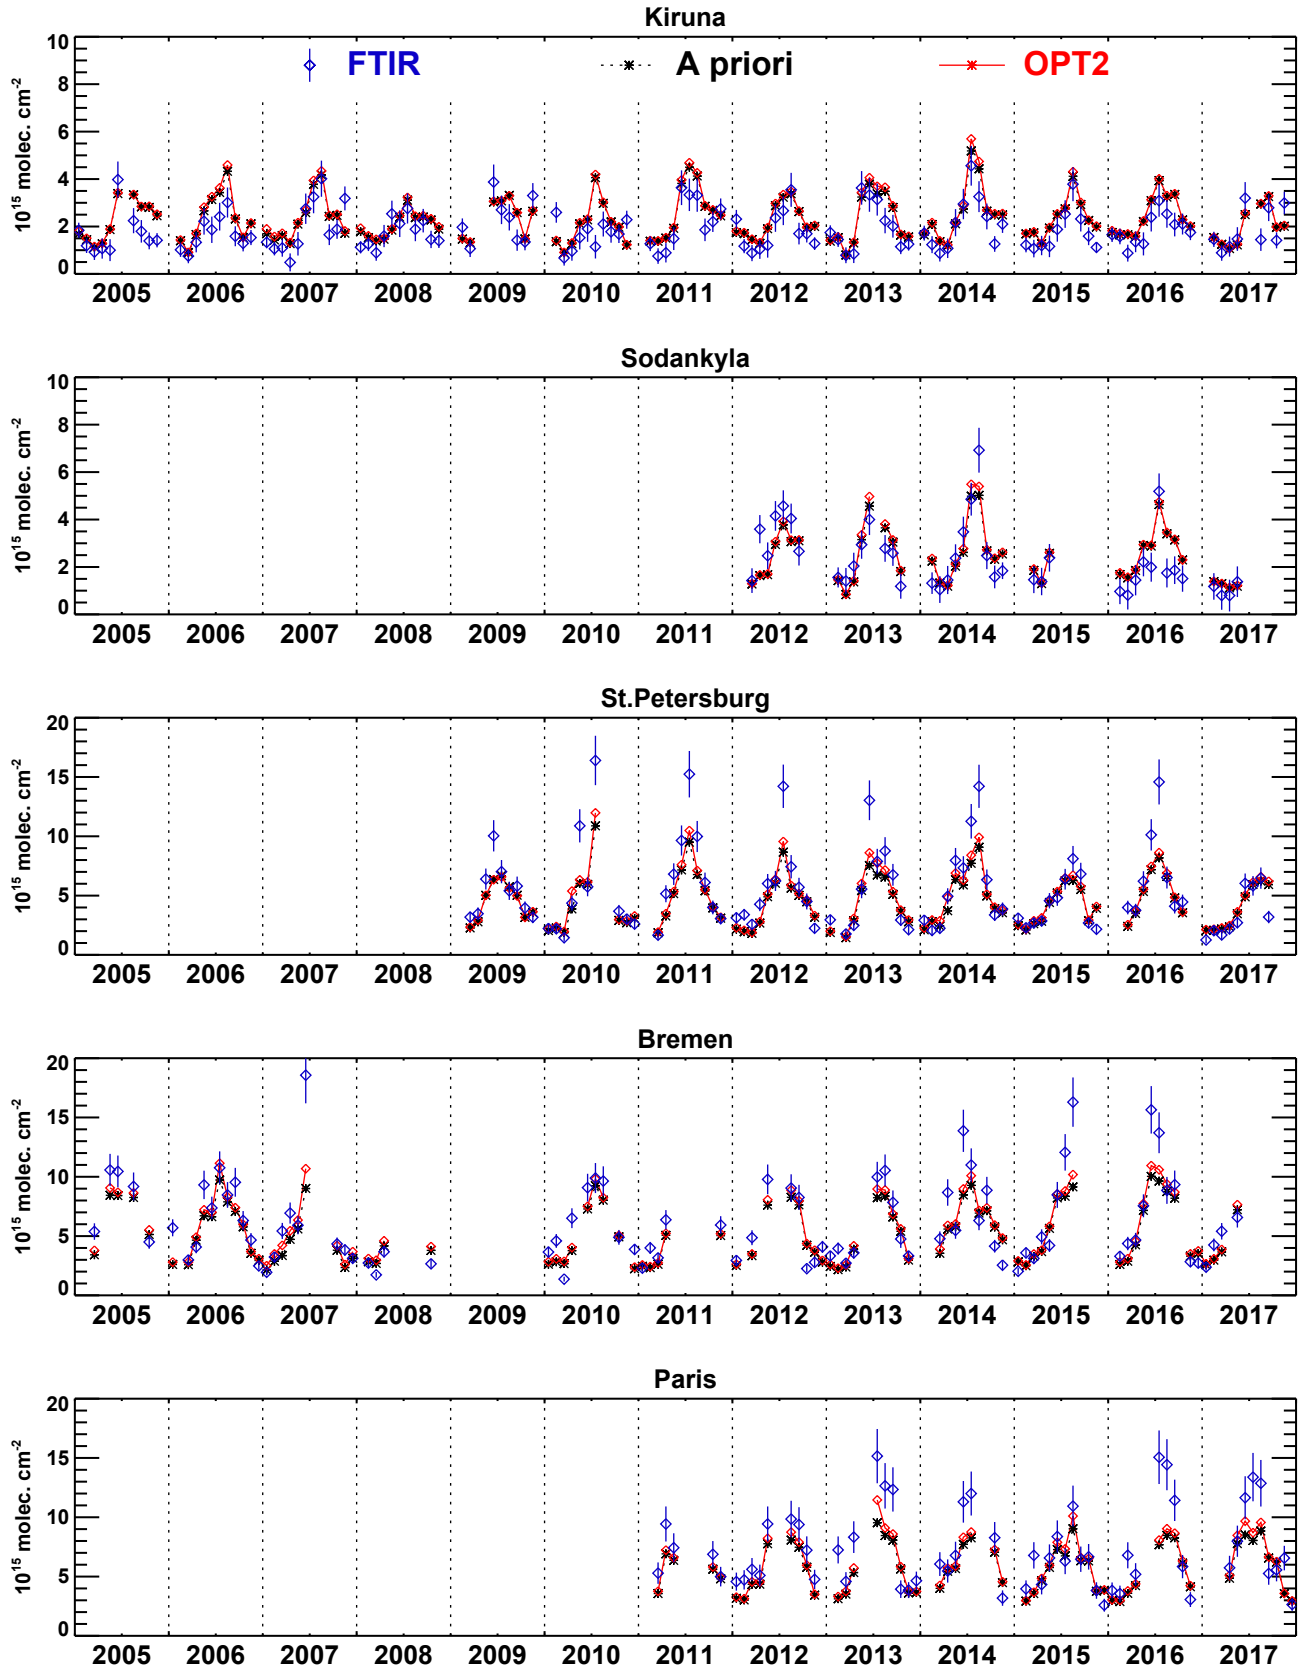

**Figure S6.** Observed (FTIR) and modelled monthly HCHO columns at Kiruna, Sodankylä, St. Petersburg, Bremen, and Paris. Symbols represent the mean FTIR columns and their systematic uncertainties. Black curve and asterisks: model with a priori emissions; red: OPT2 simulation constrained by bias-corrected OMI columns.

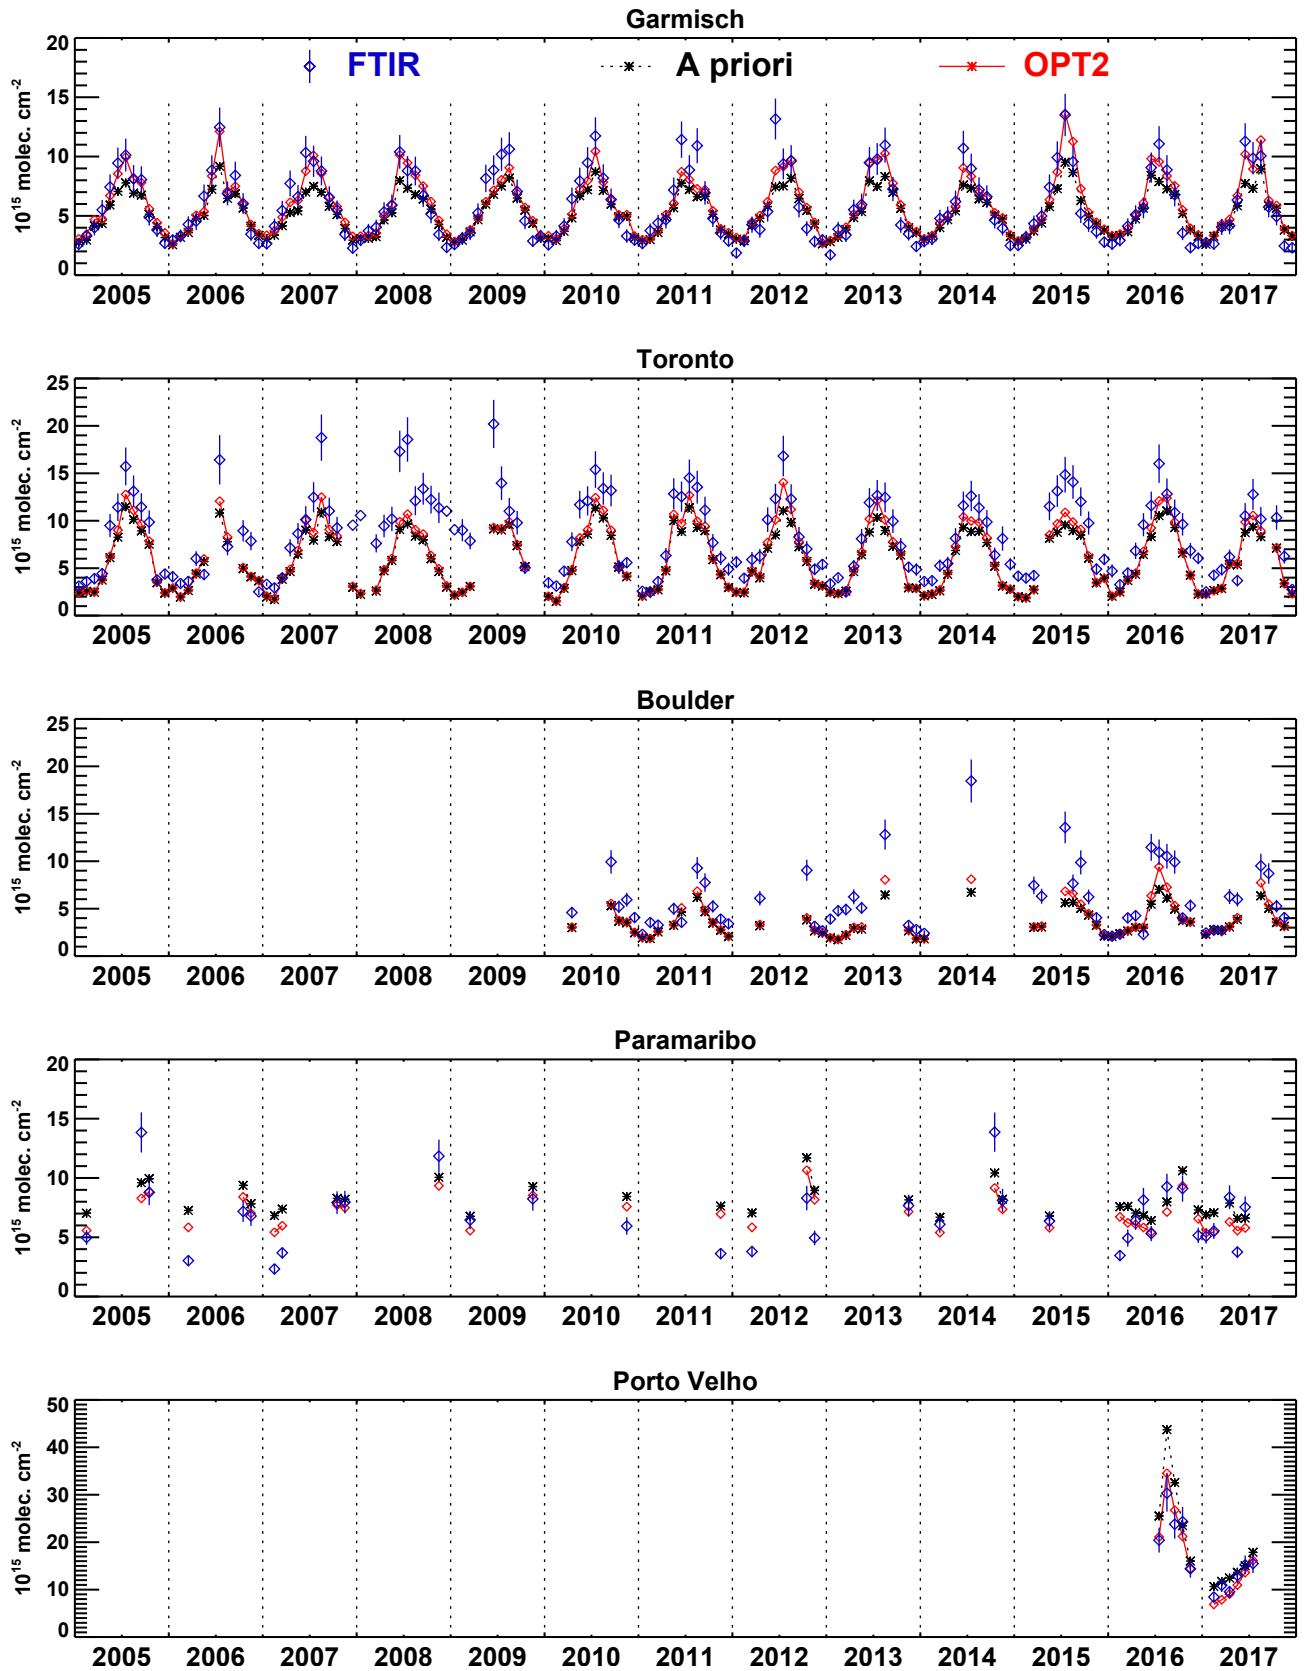

Figure S7. As previous figure, for Garmisch, Toronto, Boulder, Paramaribo, and Porto Velho.

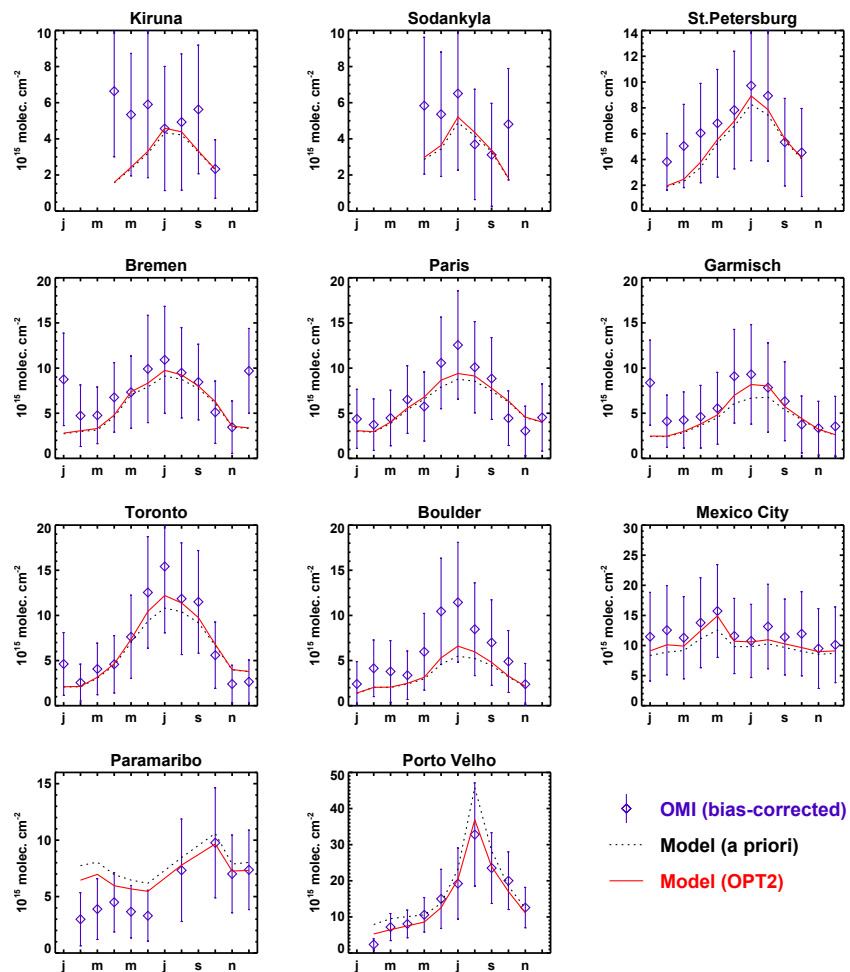

**Figure S8.** Average seasonal cycle of OMI and model HCHO columns at FTIR stations. Blue symbols with error bars represent the mean (bias-corrected) OMI columns and systematic uncertainties. Black dotted curve: model with a priori emissions; red: OPT2 simulation constrained by bias-corrected OMI columns.

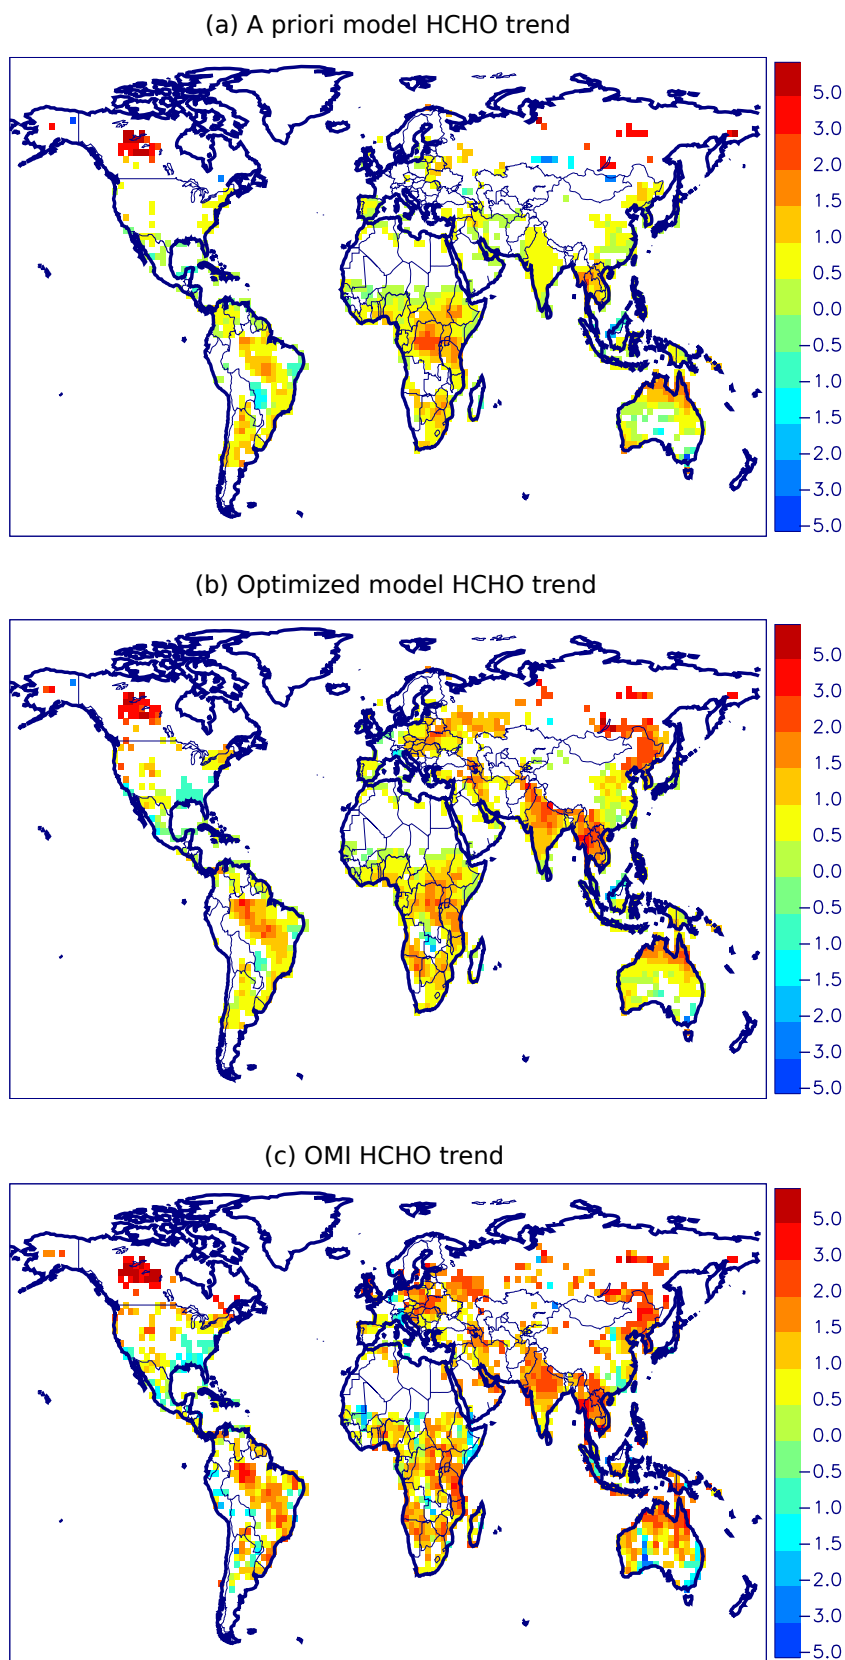

**Figure S9.** Trends (%/yr) over 2005–2016 of seasonally-averaged HCHO columns from (a) the a priori model simulation, (b) the optimized (OPT2) simulation, (c) the OMI retrieval. The HCHO columns are averaged over May–September in the Northern Hemisphere, January–May in the southern Tropics (0–30°S), and November–March in the Southern mid-latitudes (> 30°S).

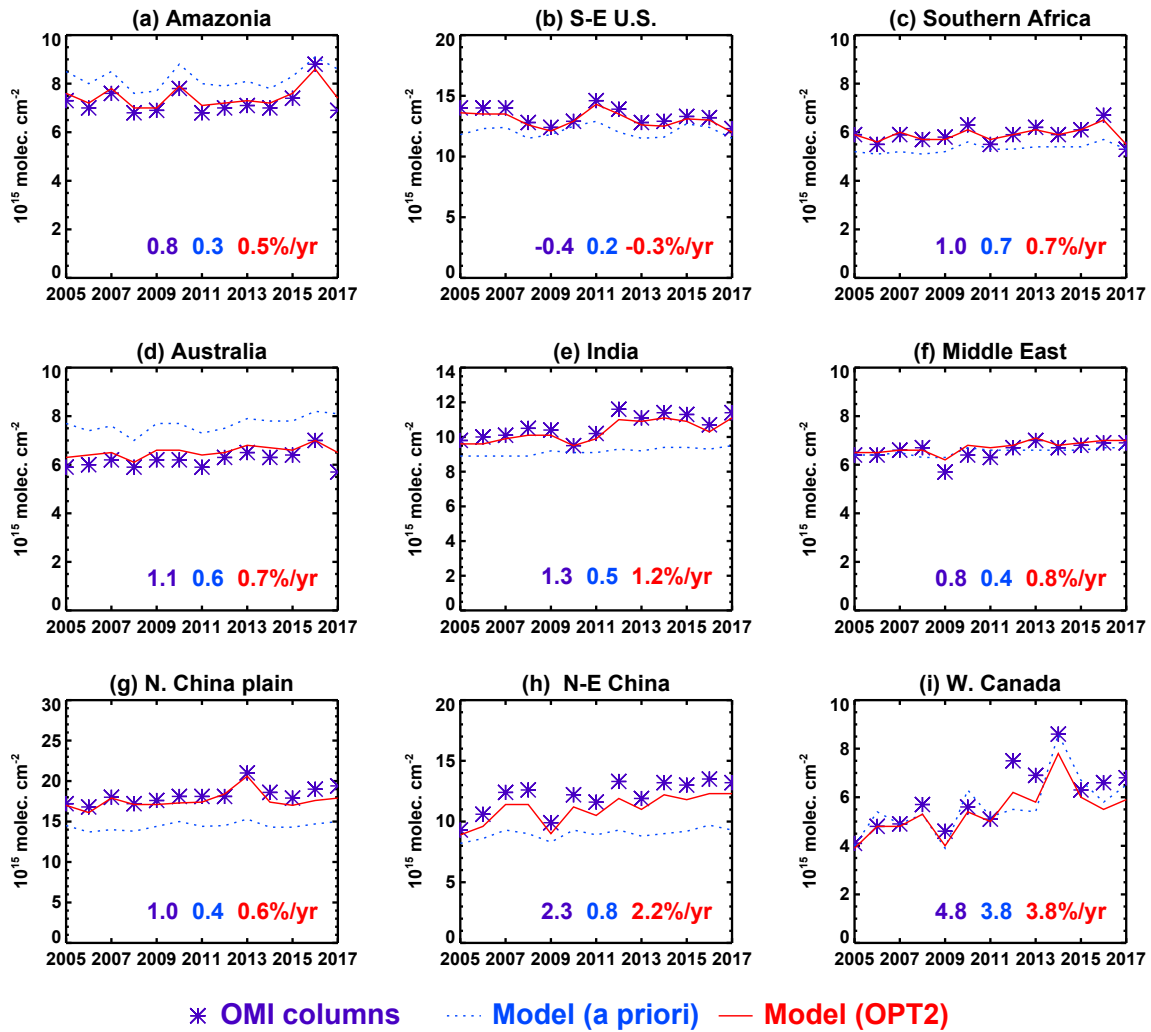

**Figure S10.** Seasonally-averaged (bias-corrected) HCHO columns averaged over the same large regions as in Fig. 13. Linear regression trends (2005–2016) are given inset. OMI: violet symbols; a priori model in blue, OPT2 model in red. The same averaging period is used as for Fig. S9.



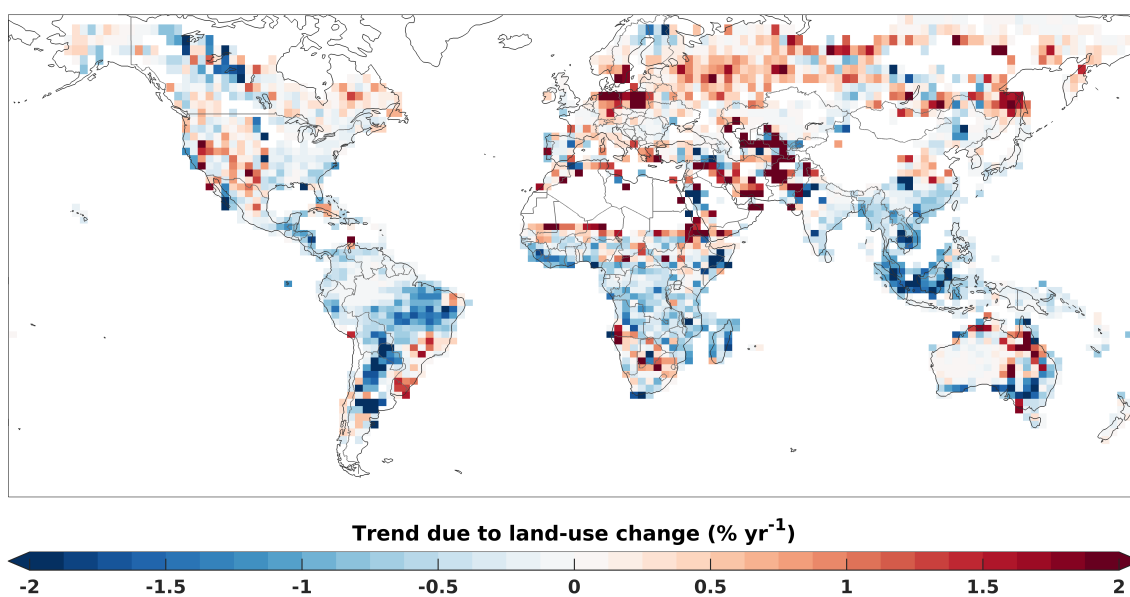

**Figure S11.** Trend in annual isoprene emissions due to land-use change calculated using MEGAN-MOHYCAN and tree cover distributions from the Global Forest Watch, following Opacka et al. (2021), for the 2005-2016 period at  $2^\circ \times 2.5^\circ$  resolution. Pixels with mean isoprene emissions below  $2.5 \times 10^9$  molec.  $\text{cm}^{-2} \text{s}^{-1}$  are left blank.
